# Supplementary material for: Sensitization of Antibiotic-Resistant Gram-Negative Bacteria to Photodynamic Therapy via Perfluorocarbon Nanoemulsion
Source: MDPI journal article supplement (doi:10.3390/ph15020156), 2022-01-27
Supplement: s1 [file s1]

## SUPPLEMENTARY MATERIALS

### Sensitization of antibiotic-resistant Gram-negative bacteria to photodynamic therapy via perfluorocarbon nanoemulsion

Peiyuan Niu <sup>†</sup>, Jialing Dai <sup>†</sup>, Zeyu Wang, Yueying Wang, Duxiang Feng, Yuanyuan Li <sup>\*</sup> and Wenjun Miao <sup>\*</sup>

School of Pharmaceutical Sciences, Nanjing Tech University, Nanjing 211816, P. R. China;  
niupy@njtech.edu.cn (P.N.); daijl@njtech.edu.cn (J.D.); wzyd@njtech.edu.cn (Z. W.); wangyueying@njtech.edu.cn (Y.W.); fengdx@njtech.edu.cn (D.F.)

<sup>\*</sup> Correspondence: liyy@njtech.edu.cn (Y.L.); miaowj@njtech.edu.cn (W.M.); Tel.: +86-25-58139399 (W.M.)

<sup>†</sup> These authors contributed equally to this paper.

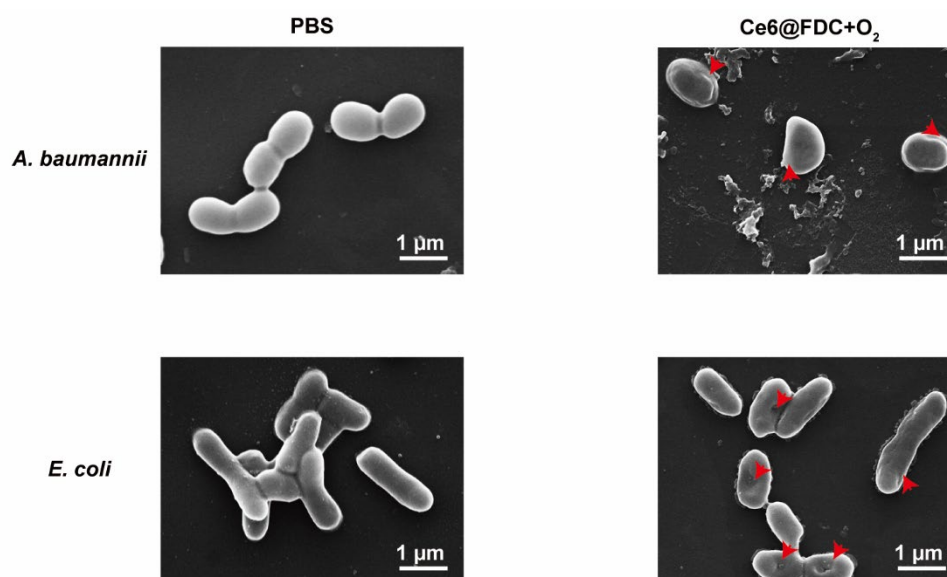

**Figure S1.** Field emission scanning electron microscopy images of bacteria after treated with PBS or Ce6@FDC + O<sub>2</sub> plus light (660 nm, 100 mW, 20 min). Red arrows indicate lesions and holes on bacterial wall. Scale bar: 1 μm.
